# Supplementary material for: Mandibular dysmorphology due to abnormal embryonic osteogenesis in FGFR2-related craniosynostosis mice
Source: PubMed Central journal article supplement (PMC6550049; doi:10.1242/dmm.038513), 2019-05-30
Supplement: dmm-12-038513-s1.pdf [file dmm-12-038513-s1.pdf]

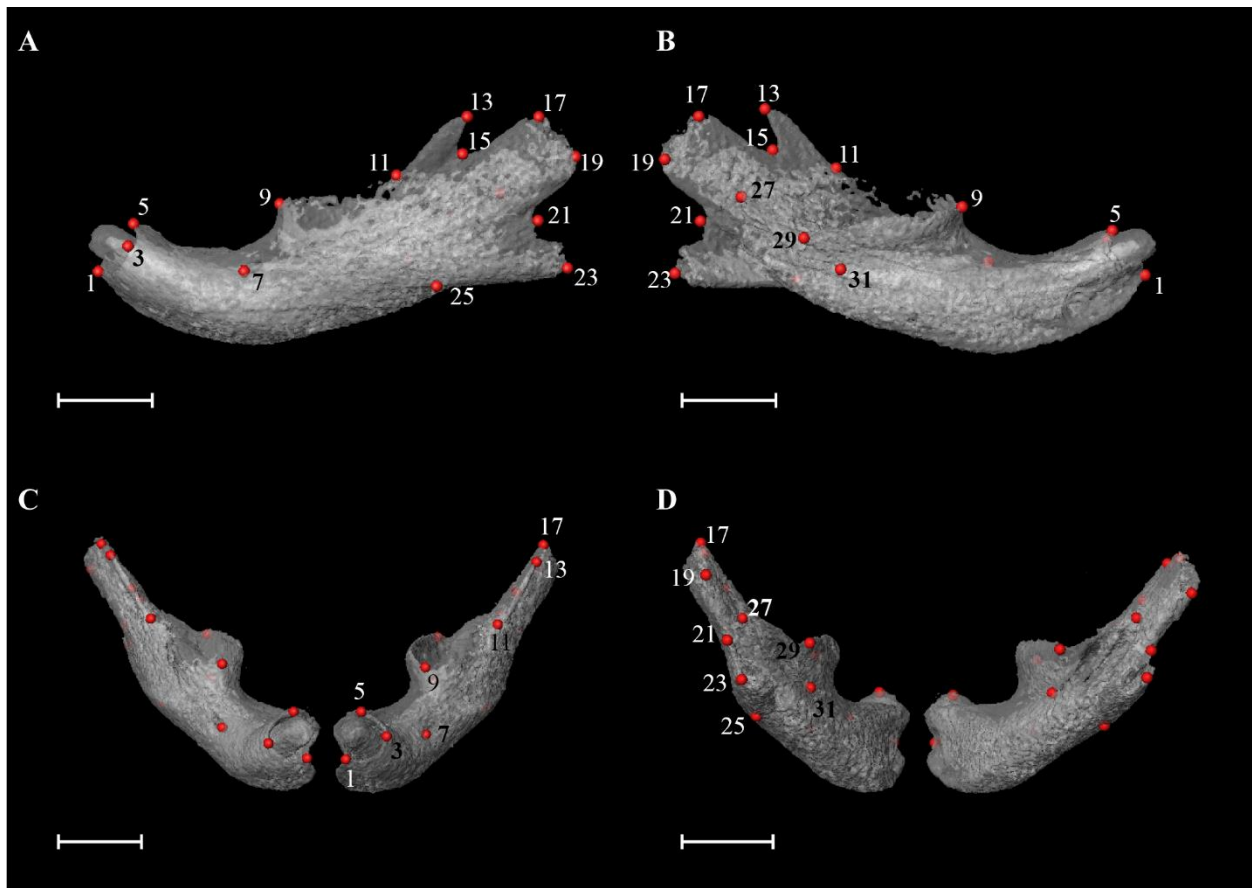

**Fig. S1. Thirty-two anatomical landmarks located on left and right hemimandibles of newborn (P0) mice.** Bilateral landmarks are annotated only on the left hemimandible. Landmark definitions are listed in Table S1. 3D coordinates of landmarks were collected from the buccal view (A) and lingual (B) view of an isosurface of the left hemimandible. Landmarks shown in the rostral (C) and caudal (D) views of the left and right hemimandibles are noted. Scale bar=1 mm.

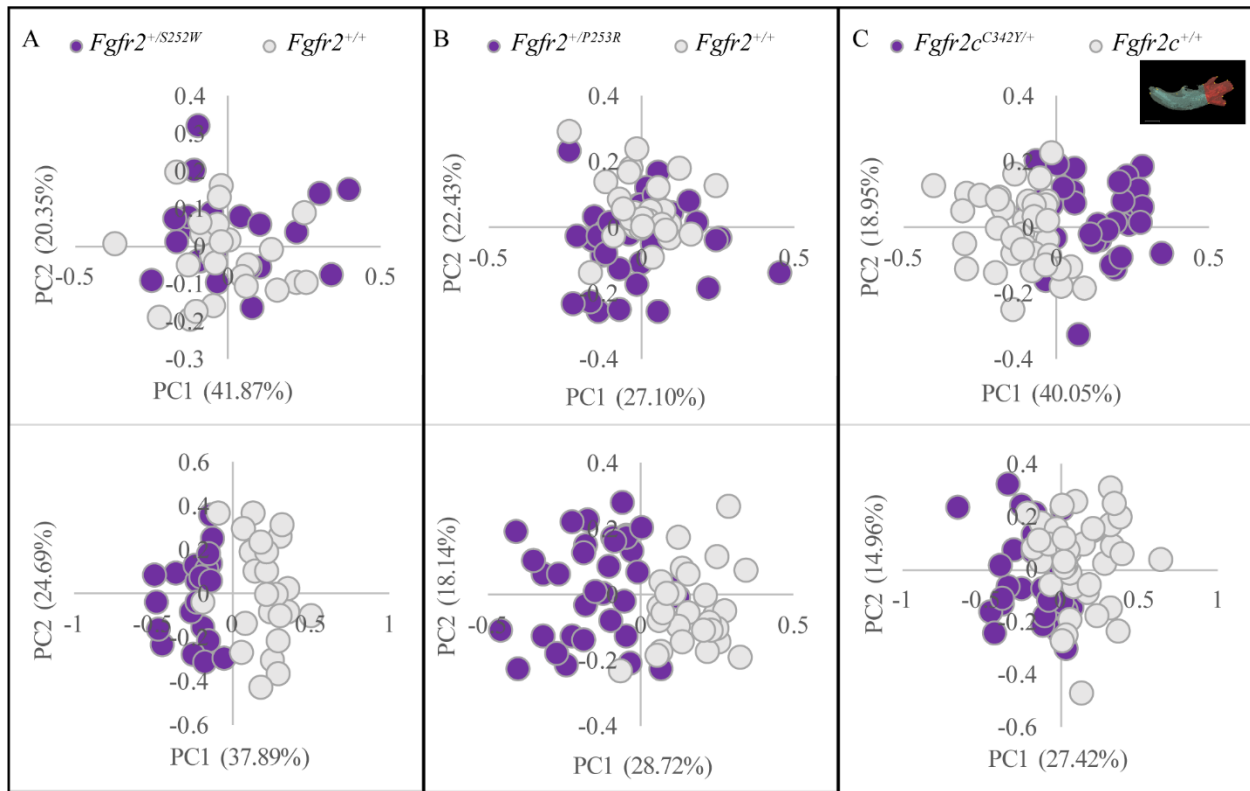

**Fig. S2. Principal component analysis (PCA) of the anterior body and ramus portion of hemimandibles of three mouse models of craniosynostosis.** Scatter plots of individual scores based on PCA from left hemimandibles of mutant and unaffected littermates of *Fgfr2*<sup>+/S252W</sup> (A) and *Fgfr2*<sup>+/P253R</sup> (B) Apert syndrome mouse models; and *Fgfr2c*<sup>C342Y/+</sup> (C) Crouzon/Pfeiffer syndrome mouse model along first and second Principal Components axes (PC1 and PC2). Separate PCAs were estimated for the anterior portion (anterior body, shown in blue in inset image) and posterior portion (ramus, shown in red in inset image) of the hemimandibles. PCA of the anterior body of the left hemimandible is shown in the top panel of each column while PCA of the left ramus portion is shown in the bottom panel.

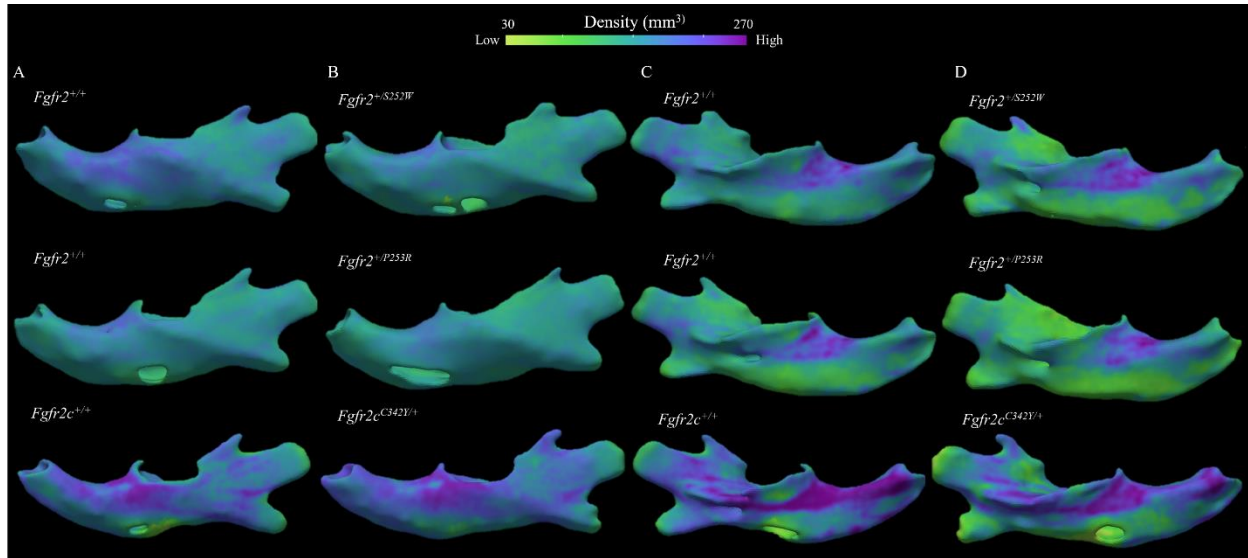

**Fig. S3. Bone mineral density mapping.** Bone mineral density (BMD) was mapped for each of the genotypes of interest: (A, B) buccal view of left hemimandibles of mice carrying *Fgfr2* mutations (B) and their respective unaffected littermates (A); (C, D) lingual view of left hemimandibles of mice carrying *Fgfr2* mutations (D) and their respective unaffected littermates (C). Though there are differences across the models, the contrast between mutant and respective unaffected littermates is greatest in the *Fgfr2*<sup>+/S252W</sup> mice.

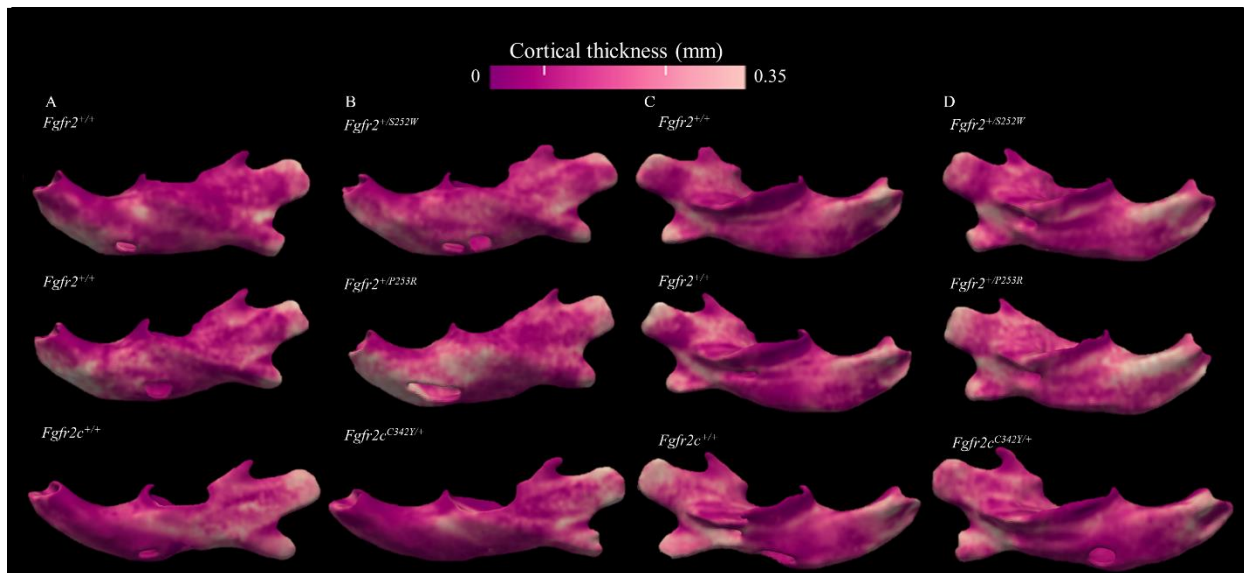

**Fig. S4. Cortical bone thickness mapping.** Cortical bone thickness was mapped for each of the genotypes of interest: (A, B) buccal view of left hemimandibles of mice carrying *Fgfr2* mutations (B) and their respective unaffected littermates (A); (C, D) lingual view of left hemimandibles of mice carrying *Fgfr2* mutations (D) and their respective unaffected littermates (C).

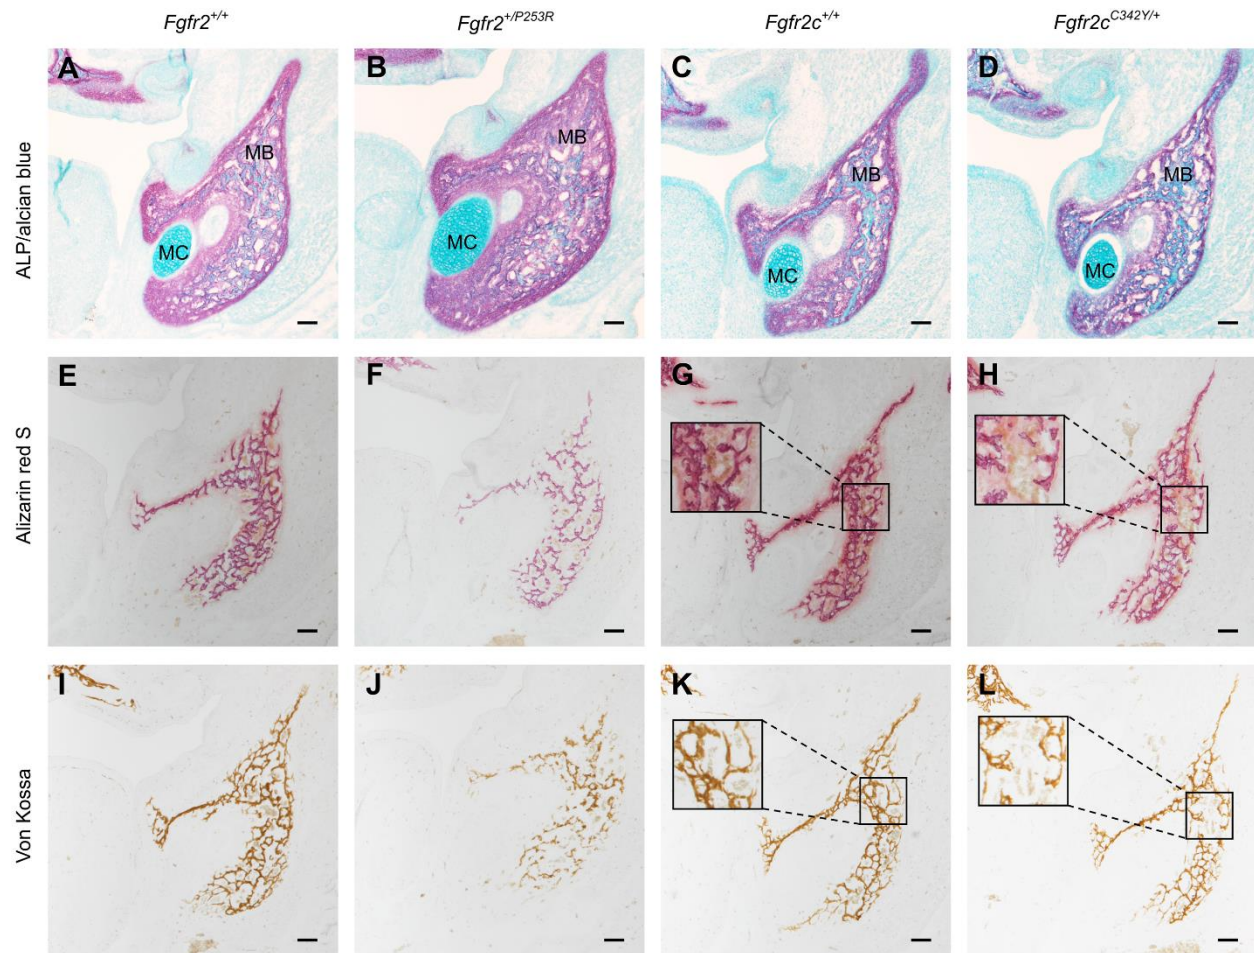

**Fig. S5. Histological analysis of the mandibles of *Fgfr2*<sup>+/P253R</sup> and *Fgfr2c*<sup>C342Y/+</sup> embryos at E16.5.** (A-D) ALP and alcian blue staining showed osteogenic tissues (red) and Meckel's cartilage (blue) in the mandible of *Fgfr2*<sup>+/P253R</sup> (B), *Fgfr2c*<sup>C342Y/+</sup> (D) and their *Fgfr2*<sup>+/+</sup> littermate embryos (A, C, respectively). MB, mandibular bone. MC, Meckel's cartilage. (E-H) Alizarin red S staining and (I-L) von Kossa staining showed ossification in the mandible of *Fgfr2*<sup>+/P253R</sup> (F, J) and *Fgfr2*<sup>+/+</sup> littermates (E, I), and *Fgfr2c*<sup>C342Y/+</sup> (H, L) and *Fgfr2*<sup>+/+</sup> littermates (G, K). Scale bar=100  $\mu$ m. Boxes in G, H, K and L indicate the small area that exhibits impaired microarchitecture at a higher magnification in *Fgfr2c*<sup>C342Y/+</sup> embryos compared with *Fgfr2*<sup>+/+</sup> littermates.

**A**

**Biological Process**

animal organ development | GO:0048513  
 multicellular organismal process | GO:0032501  
 developmental process | GO:0032502  
 anatomical structure development | GO:0048856  
 system development | GO:0048731  
 multicellular organism development | GO:0007275  
 anatomical structure morphogenesis | GO:0009653  
 cell development | GO:0048468  
 cell differentiation | GO:0030154  
 cellular developmental process | GO:0048869  
 cell adhesion | GO:0007155  
 biological adhesion | GO:0022610  
 ossification | GO:0001503  
 myeloid cell development | GO:0061515  
 erythrocyte development | GO:0048821  
 regulation of multicellular organismal process | GO:0051239  
 regulation of biological quality | GO:0065008  
 localization | GO:0051179  
 movement of cell or subcellular component | GO:0006928  
 locomotion | GO:0040011  
 tissue remodeling | GO:0048771  
 bone remodeling | GO:0046849  
 bone resorption | GO:0045453  
 tissue homeostasis | GO:0001894  
 osteoclast differentiation | GO:0030316  
 regulation of bone resorption | GO:0045124  
 regulation of bone remodeling | GO:0046850  
 positive regulation of tissue remodeling | GO:0034105  
 positive regulation of bone resorption | GO:0045780  
 positive regulation of bone remodeling | GO:0046852

*Fgfr2<sup>+/S252W</sup> vs Fgfr2<sup>+/+</sup> UP*  
*Fgfr2<sup>+/S252W</sup> vs Fgfr2<sup>-/-</sup> DN*

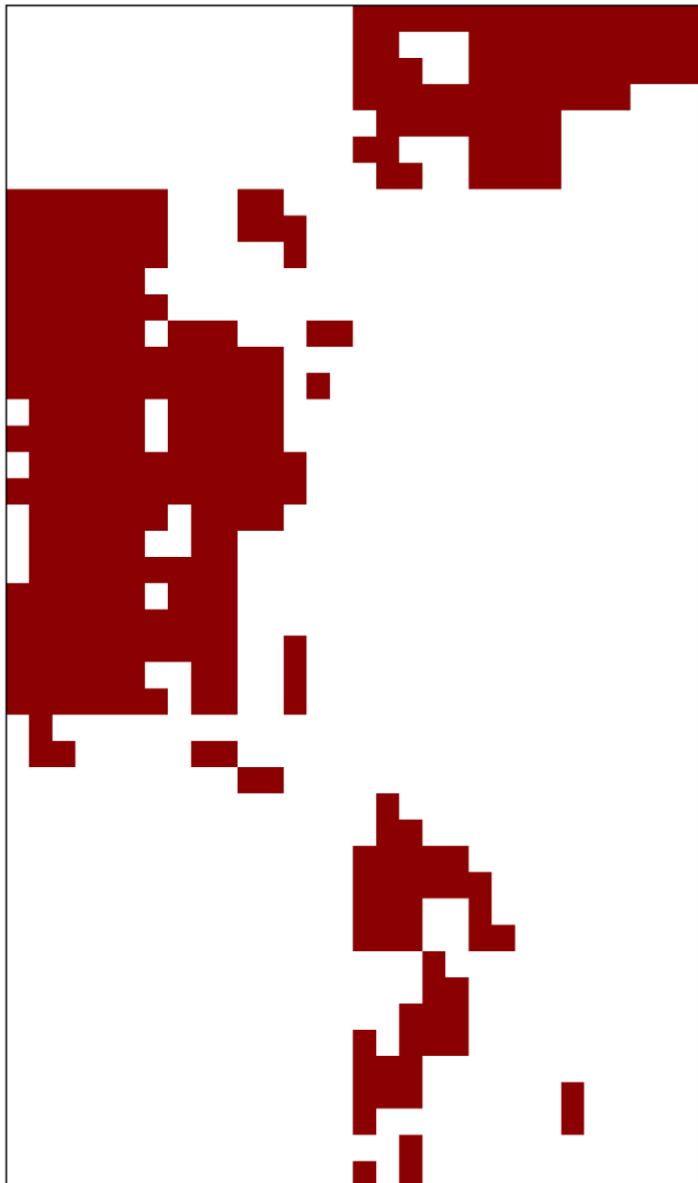

- Itgb3
- Dcstamp, Oscar | 2
- Car2, Tnfrsf11a | 2
- Csf1r
- Rac2
- Acp5
- Ctsk
- Vcam1
- Thbs3
- Aspn
- C1qb
- Aldh1a3, Cryab | 2
- Bpgm, Hba-a1, Hba-a2, Hbb-bs | 4
- Pdpn
- Fbn1
- Negr1
- Cd24a
- Tnn
- Igf1, Ptn | 2
- Ackr3, Eglf7 | 2
- Chac1
- Fmod, Matn2, Ogn | 3
- Sgcg
- Cdkn1c, D3Bwg0562e, Gpr126, Nrk | 4
- Sfrp2
- Chrd1
- Mgp
- Acta2, Mcc, Penk, Sic26a7, Srl | 5
- Fabp4
- Abi3bp, Mfap4, Smoc2 | 3
- Ckb, Nav2 | 2
- Akr1c18, Atp6v0d2, Atp6v1a, Dgki, Slc4a2, Unc13c, Xpr1 | 7
- 4930506M07Rik, Abl2, Dock5, Egr1, Fbln1, Itgb2, Ptxna4, Sema5a | 8
- Mmp9
- Chd7
- Enpp1
- Stard9
- Cytip2, Etv1, Ext1 | 3
- Gfra1, Srgap3 | 2
- Arb, Il1r1, Megf10 | 3
- Anpep, Atp1b1, Pls1, Prosl | 4
- Calcr
- Ocstamp
- Agap1, Emb, Gnptab, Flapgef6, Slc37a2 | 5
- Ank

**B**

Cellular Component

membrane | GO:0016020  
 plasma membrane part | GO:0044459  
 plasma membrane | GO:0005886  
 cell periphery | GO:0071944  
 extracellular matrix | GO:0031012  
 proteinaceous extracellular matrix | GO:0005578  
 extracellular space | GO:0005615  
 extracellular region | GO:0005576  
 extracellular region part | GO:0044421  
 cell surface | GO:0009986  
 cytosolic part | GO:0044445  
 interstitial matrix | GO:0005614  
 microfibril | GO:0001527  
 extracellular matrix component | GO:0044420  
 basement membrane | GO:0005604  
 lamellipodium | GO:0030027  
 microvillus | GO:0005902  
 vacuole | GO:0005773  
 lytic vacuole | GO:0000323  
 lysosome | GO:0005764  
 apical part of cell | GO:0045177  
 apical plasma membrane | GO:0016324

*Fgfr2<sup>flx/flx</sup>* vs *Fgfr2<sup>+/+</sup>* UP  
*Fgfr2<sup>flx/flx</sup>* vs *Fgfr2<sup>+/+</sup>* DN

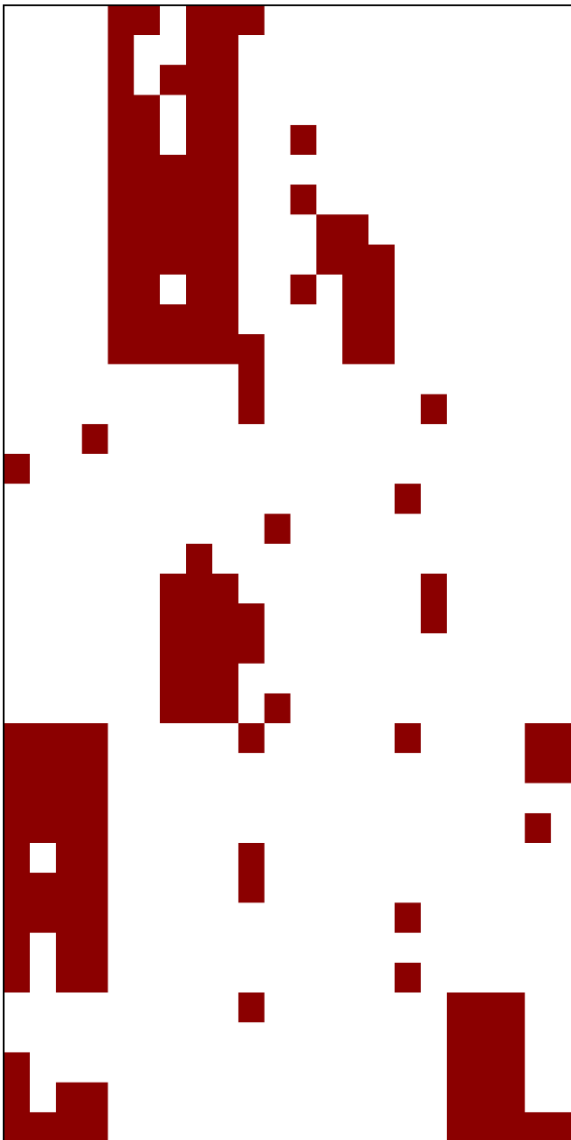

- Tnn
- Thbs3
- Mgp
- Aspn
- Abi3bp
- Fmod, Ogn | 2
- Igf1
- Mfap4
- Fbn1
- Smoc2
- Matn2
- Ptn
- Ackr3, Cryab, D3Bwg0562e, Emr1, Gpr126 | 5
- Cd24a, Pdpn | 2
- Pls1
- Agap1, Cyp2s1, Cyp4v3, Ext1, Gnptab, Ocstamp, Sema5a, Slc37a2, Tm4sf19 | 9
- 4930506M07Rik
- Rpl15
- Chrd1, Penk, Prss35 | 3
- Lyz2
- Vcam1
- Egfl7
- C1qb, Lipi, Sfrp2 | 3
- Hba-a1, Hba-a2, Hbb-bs, Hbb-bt | 4
- Itgb3
- Atp1b1, Rapgef6, Slc4a2 | 3
- Ank, Calcr, Col25a1, Dgki, Emb, Megf10, Plxna4, Unc13c, Xpr1 | 9
- Car2
- Dcstamp, Oscar | 2
- Anpep, Csf1r, Enpp1, Gfra1, Il1r1, Itgb2, Tnfrsf11a | 7
- Abl2
- Dock5, Enox1, Hist2h2be, Plcb2, Sviol | 5
- Ptpn13, Rac2 | 2
- Arsb
- Acp5, Ctsk, Gns | 3
- Laptm5
- Cd68
- Atp6v0d2, Atp6v1a | 2

C

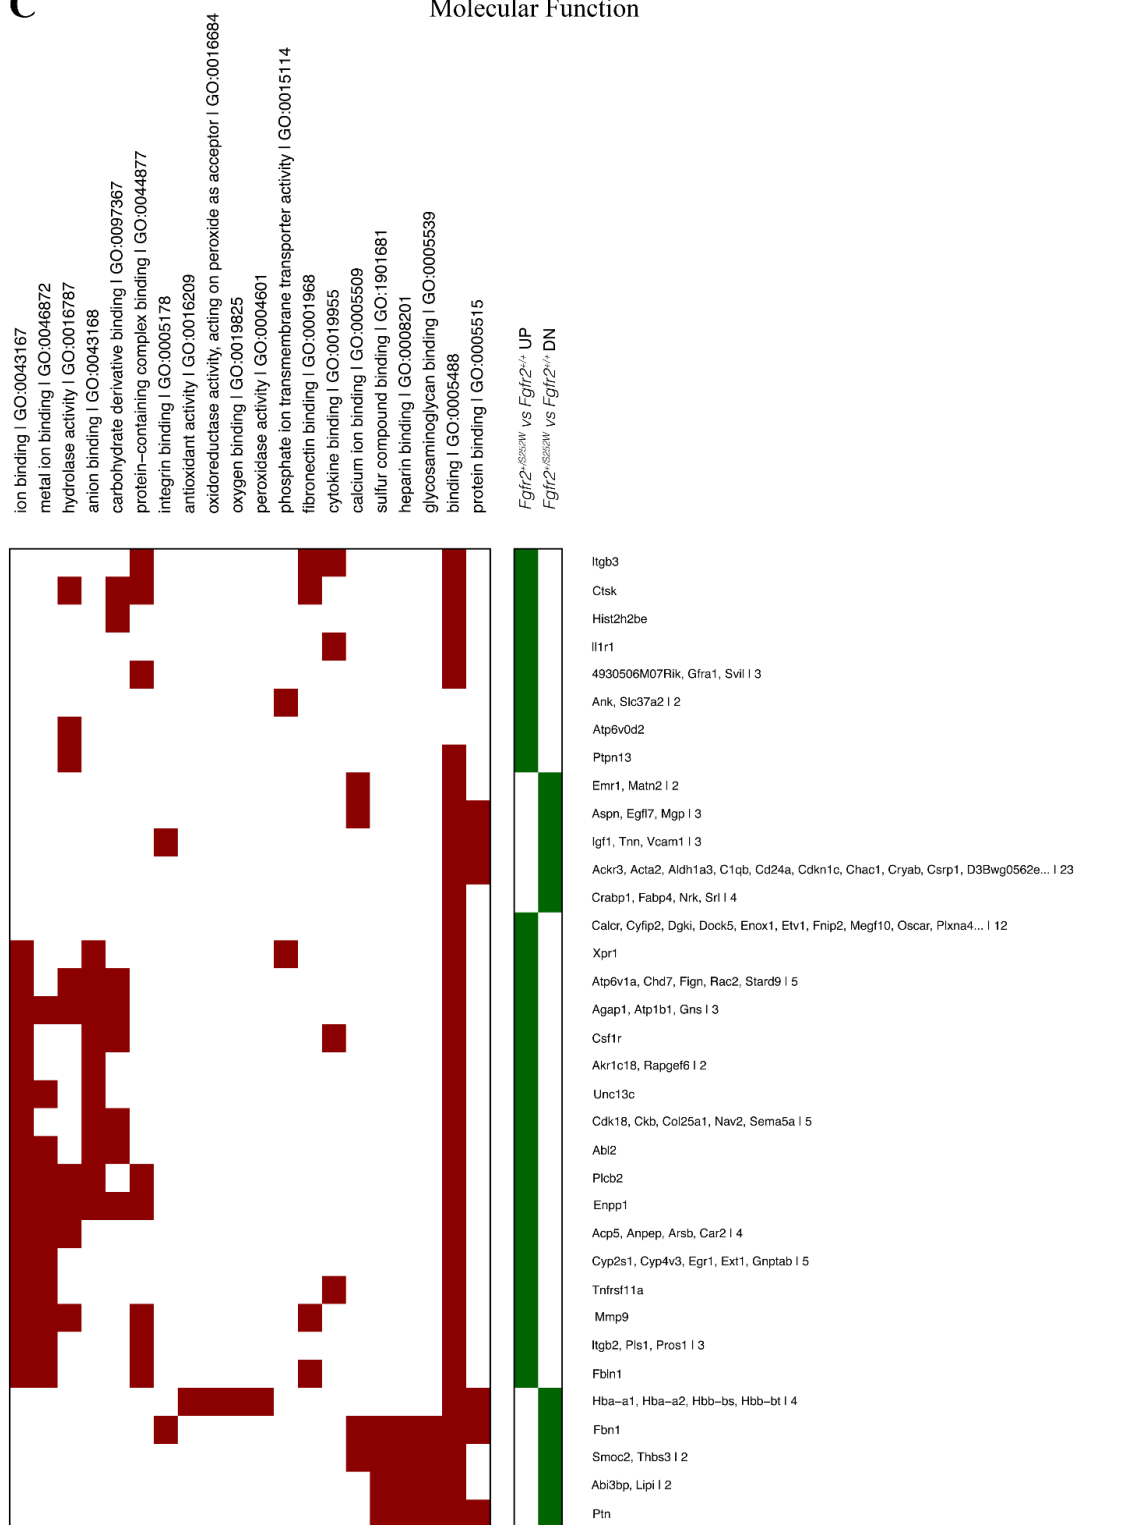

**Fig. S6. Gene ontology analysis of DEGs in mandibular bone of *Fgfr2<sup>+/S252W</sup>* embryos at E16.5.** (A) Biological process. (B) Cellular component. (C) Molecular function.

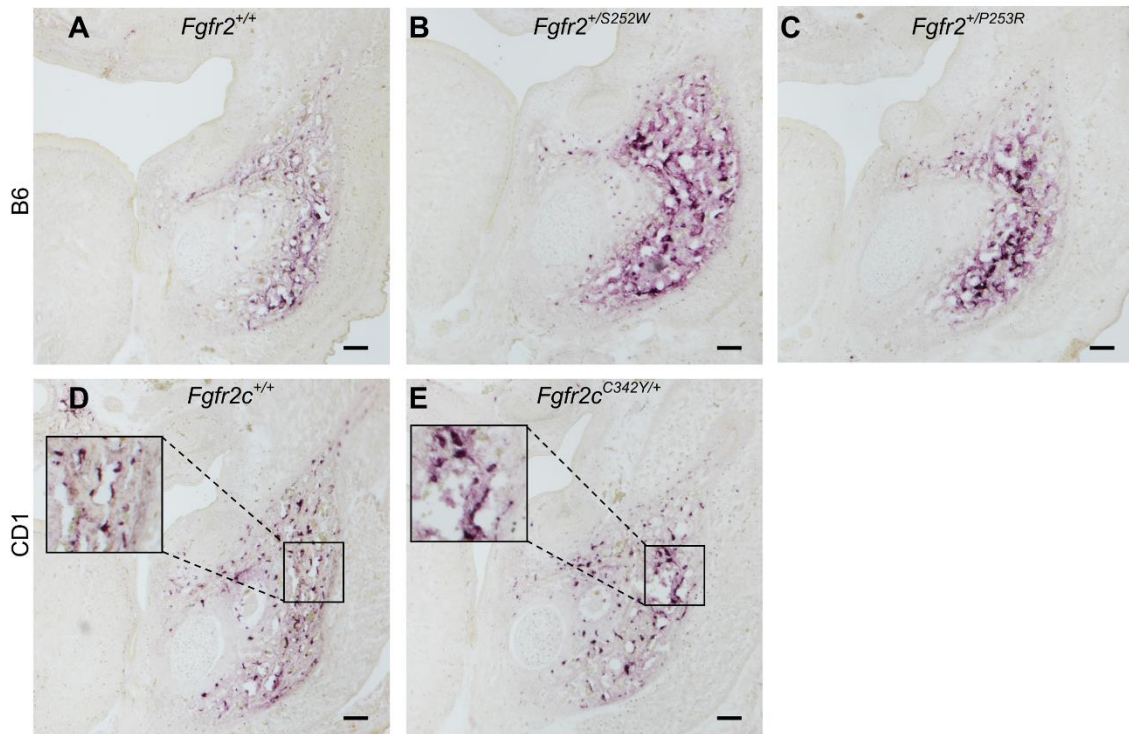

**Fig. S7. Osteoclast activity in the mandibles of three FGFR2-related craniosynostosis mouse models at E16.5.** (A-E) TRAP staining (purple) in mandibular bone of *Fgfr2*<sup>+/+</sup> (A), *Fgfr2*<sup>+/S252W</sup> (B) and *Fgfr2*<sup>+/P253R</sup> (C) embryos on a C57BL6/J (B6) background; and *Fgfr2c*<sup>+/+</sup> (D) and *Fgfr2c*<sup>C342Y/+</sup> (E) on a CD1 background. Scale bar=100 μm. The boxes in D and E indicate the area that shows increased signal in *Fgfr2c*<sup>C342Y/+</sup> embryos compared with unaffected littermates.



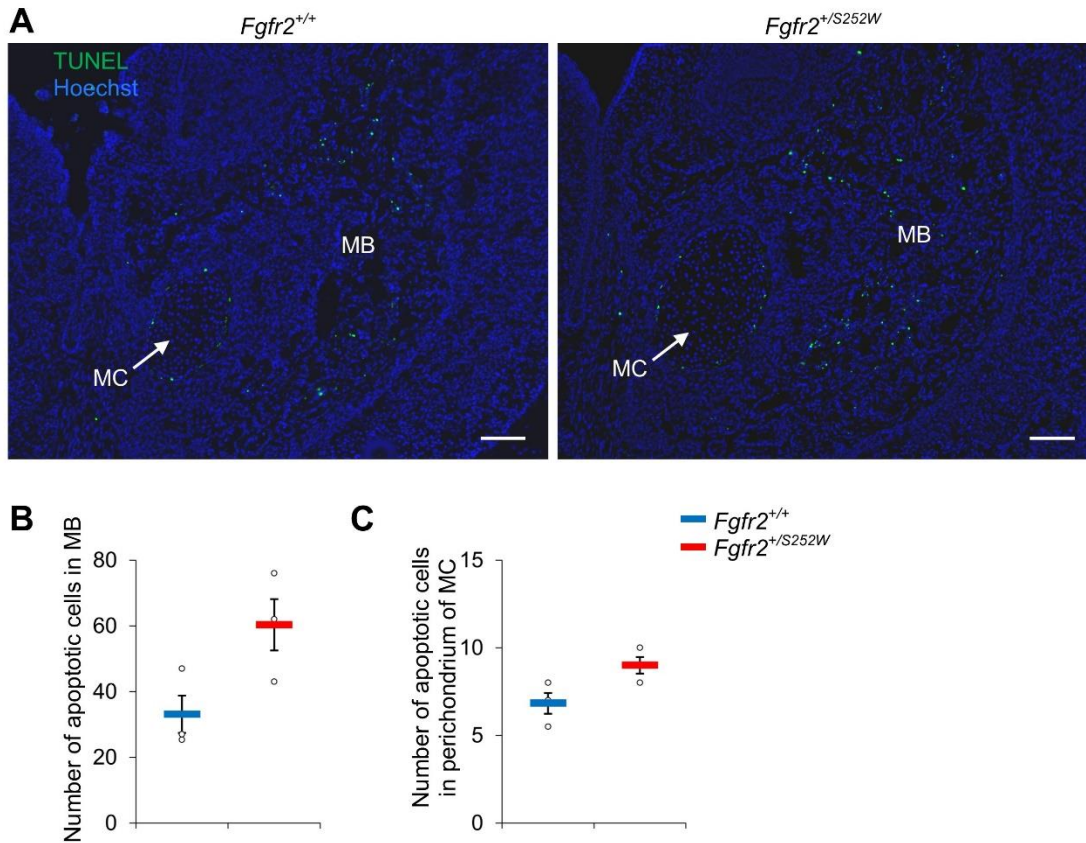

**Fig. S8. Apoptosis in the mandible of *Fgfr2*<sup>+/S252W</sup> embryos at E16.5.** (A) TUNEL assay in the mandibular area. TUNEL signal was detected in the mandibular bone (MB) and the perichondrium of Meckel's cartilage (MC) of both *Fgfr2*<sup>+/+</sup> and *Fgfr2*<sup>+/S252W</sup> embryos. Scale bar=100  $\mu$ m. (B-C) Quantification shows the number of TUNEL-positive cells in the mandibular bone (B) and the perichondrium (C) of *Fgfr2*<sup>+/+</sup> ( $n=3$ ) and *Fgfr2*<sup>+/S252W</sup> ( $n=3$ ) embryos. The experimental data were analyzed by two-tailed Welch's t-test and expressed as the mean $\pm$ s.e.m.

**Table S1. Anatomical definitions of landmarks displayed in Fig. 1.**

| Landmark<br>(Left, Right) | Anatomical Definition                                                                                                                        | Region |
|---------------------------|----------------------------------------------------------------------------------------------------------------------------------------------|--------|
| 1, 2                      | Inferior-most point on incisor alveolar rim at midline of the incisor at bone-tooth junction                                                 | AB     |
| 3, 4                      | Junction of the rim of the alveolar process with incisor, most lateral and centered along the cranial-caudal axis (taken on bone, not tooth) | AB     |
| 5, 6                      | Superior-most point on incisor alveolar rim at midline of bone-tooth junction                                                                | AB     |
| 7, 8                      | Anterior lip of the mental foramen                                                                                                           | AB     |
| 9, 10                     | Antero-lateral edge of the molar alveolar process                                                                                            | AB     |
| 11, 12                    | Intersection of molar alveolar rim and base of coronoid process (posterior molar alveolus)                                                   | R, AB  |
| 13, 14                    | Most dorsal point of the coronoid process                                                                                                    | R      |
| 15, 16                    | Most cranio-ventral point between the coronoid and condyloid processes                                                                       | R      |
| 17, 18                    | Most caudal point on the cranial angle of the condyloid process                                                                              | R      |
| 19, 20                    | Most caudal point on the ventral angle of the condyloid process                                                                              | R      |
| 21, 22                    | Most anterior point between the angle that separates the condyloid and angular processes                                                     | R      |
| 23, 24                    | Midpoint on the cranial caudal axis of the most posterior aspect of the angular process                                                      | R      |
| 25, 26                    | Cranial-most point of the angular process along the ventral surface of the mandible                                                          | R, AB  |
| 27, 28                    | Dorsal mandibular foramen                                                                                                                    | R      |
| 29, 30                    | Most ventral edge of the molar alveolar process, toward the midline                                                                          | R      |
| 31, 32                    | Ventral mandibular foramen                                                                                                                   | AB     |

Landmarks are classified as located on Anterior Body (AB;  $n=8$ ) or Ramus (R;  $n=10$ ) to create subsets for analysis. Additional landmarks defined on the embryonic mouse skull can be found at: <http://www.getahead.la.psu.edu/landmarks>.

**Table S2. Results (*P* values) of nonparametric null hypothesis tests for form differences (EDMA) between mice (P0) carrying a mutation for a specific craniosynostosis syndrome and their littermates without the mutation.**

| Craniosynostosis Model           | Left and Right Hemimandibles (32 landmarks) | Left Hemimandible (16 landmarks) | Right Hemimandible (16 landmarks) |
|----------------------------------|---------------------------------------------|----------------------------------|-----------------------------------|
| <i>Fgfr2</i> <sup>+/S252W</sup>  | 0.001                                       | 0.001                            | 0.001                             |
| <i>Fgfr2</i> <sup>+/P253R</sup>  | 0.001                                       | 0.001                            | 0.001                             |
| <i>Fgfr2c</i> <sup>C342Y/+</sup> | 0.001                                       | 0.001                            | 0.001                             |

**Table S3. Differentially expressed genes in the mandibular bone of *Fgfr2*<sup>+/S252W</sup> embryos at E16.5 compared to their *Fgfr2*<sup>+/+</sup> littermates.**

| Ensembl ID         | Gene Symbol | log <sub>2</sub> FC | Average Expression | t            | <i>P</i> Value | Adjusted <i>P</i> Value |
|--------------------|-------------|---------------------|--------------------|--------------|----------------|-------------------------|
| ENSMUSG00000030257 | Srgap3      | 1.27673267          | 6.610930486        | 9.640369417  | 5.20142E-07    | 0.003057916             |
| ENSMUSG00000037370 | Enpp1       | 1.831773279         | 8.59074871         | 10.20061207  | 2.82417E-07    | 0.003057916             |
| ENSMUSG00000045573 | Penk        | -1.928167528        | 4.158086959        | -9.22055957  | 8.37469E-07    | 0.003188606             |
| ENSMUSG00000034573 | Ptpn13      | 1.133258416         | 6.830424831        | 8.998531675  | 1.08474E-06    | 0.003188606             |
| ENSMUSG00000069917 | Hba-a2      | -1.622438006        | 4.106158794        | -8.558032456 | 1.83915E-06    | 0.003902154             |
| ENSMUSG00000022265 | Ank         | 1.326616334         | 7.721340364        | 8.493163202  | 1.99123E-06    | 0.003902154             |
| ENSMUSG00000073940 | Hbb-bt      | -1.628190337        | 8.121203499        | -8.263608921 | 2.64729E-06    | 0.004446698             |
| ENSMUSG00000042436 | Mfap4       | -1.15168023         | 6.836719917        | -8.135654118 | 3.11049E-06    | 0.004571637             |
| ENSMUSG00000024593 | Mefl10      | 0.927309625         | 6.425005115        | 7.528605255  | 6.85637E-06    | 0.008957467             |
| ENSMUSG00000036905 | C1qb        | -2.263114164        | 2.013981763        | -6.999425722 | 1.41583E-05    | 0.011193739             |
| ENSMUSG00000052305 | Hbb-bs      | -1.57470114         | 9.839937637        | -7.157779    | 1.13549E-05    | 0.011193739             |
| ENSMUSG00000035783 | Acta2       | -1.163348891        | 5.560032653        | -6.993321688 | 1.42802E-05    | 0.011193739             |
| ENSMUSG00000006369 | Fbln1       | 0.877748065         | 5.903300431        | 7.109264313  | 1.21449E-05    | 0.011193739             |
| ENSMUSG00000054594 | Oscar       | 1.217936999         | 5.141501095        | 7.270388572  | 9.72461E-06    | 0.011193739             |
| ENSMUSG00000040703 | Cyp2s1      | 1.331780479         | 3.815520063        | 6.998767749  | 1.41714E-05    | 0.011193739             |
| ENSMUSG00000031351 | Zfp185      | -2.478906784        | 3.159340528        | -6.742466291 | 2.03933E-05    | 0.011887187             |
| ENSMUSG00000033491 | Prss35      | -1.351275459        | 5.889560643        | -6.721057207 | 2.1031E-05     | 0.011887187             |
| ENSMUSG00000040569 | Slc26a7     | -1.106708548        | 6.18519432         | -6.763093111 | 1.97983E-05    | 0.011887187             |
| ENSMUSG00000037664 | Cdkn1c      | -0.880989857        | 8.705576379        | -6.714493501 | 2.12307E-05    | 0.011887187             |
| ENSMUSG00000024621 | Csflr       | 0.932343075         | 7.271710056        | 6.790660552  | 1.90318E-05    | 0.011887187             |
| ENSMUSG00000020340 | Cyfp2       | 1.222456601         | 6.830403391        | 6.838067414  | 1.77866E-05    | 0.011887187             |
| ENSMUSG00000028047 | Thbs3       | -1.146915292        | 4.350320931        | -6.66151792  | 2.29185E-05    | 0.012248919             |
| ENSMUSG00000052512 | Nav2        | 0.954836312         | 6.560031841        | 6.618351607  | 2.43993E-05    | 0.012473328             |
| ENSMUSG00000014846 | Tppp3       | -2.657022312        | 2.498697296        | -6.399689044 | 3.36333E-05    | 0.015732053             |
| ENSMUSG00000055013 | Agap1       | 0.824170057         | 6.949305293        | 6.376950077  | 3.47877E-05    | 0.015732053             |
| ENSMUSG00000023964 | Calcr       | 1.39086817          | 4.385746777        | 6.386112042  | 3.43176E-05    | 0.015732053             |
| ENSMUSG00000044667 | Plppr4      | -1.64880105         | 3.281452634        | -6.337299974 | 3.69024E-05    | 0.016070294             |
| ENSMUSG00000021388 | Aspn        | -1.565468808        | 7.851433763        | -6.235000826 | 4.30138E-05    | 0.017532802             |
| ENSMUSG00000026321 | Tnfrsf11a   | 0.878575936         | 6.328271017        | 6.231469435  | 4.3243E-05     | 0.017532802             |

|                    |          |              |              |              |             |             |
|--------------------|----------|--------------|--------------|--------------|-------------|-------------|
| ENSMUSG00000069516 | Lyz2     | -1.48397449  | 5.657315666  | -5.984140315 | 6.30167E-05 | 0.021283798 |
| ENSMUSG00000030218 | Mgp      | -1.221549215 | 4.443285577  | -6.029622637 | 5.87632E-05 | 0.021283798 |
| ENSMUSG00000041559 | Fmod     | -0.935657006 | 6.937668196  | -6.047249988 | 5.71975E-05 | 0.021283798 |
| ENSMUSG00000026469 | Xpr1     | 0.756418685  | 8.588488909  | 5.965430507  | 6.48599E-05 | 0.021283798 |
| ENSMUSG00000035311 | Gnptab   | 0.877553017  | 7.078081271  | 6.048247317  | 5.71102E-05 | 0.021283798 |
| ENSMUSG00000022303 | Dcstamp  | 1.019517844  | 5.581854423  | 5.945315992  | 6.69054E-05 | 0.021283798 |
| ENSMUSG00000040061 | Plcb2    | 1.240168118  | 3.840512082  | 5.944636192  | 6.69757E-05 | 0.021283798 |
| ENSMUSG00000021214 | Akr1c18  | 1.299377329  | 4.04982874   | 5.9744297    | 6.39663E-05 | 0.021283798 |
| ENSMUSG00000020053 | Igf1     | -1.273626277 | 6.98869413   | -5.913249668 | 7.03087E-05 | 0.021754992 |
| ENSMUSG00000028238 | Atp6v0d2 | 0.857306076  | 8.426331011  | 5.891337145  | 7.27394E-05 | 0.021929993 |
| ENSMUSG00000031283 | Chrd11   | -0.834377044 | 5.949540909  | -5.813408207 | 8.21296E-05 | 0.021947271 |
| ENSMUSG00000001270 | Ckb      | 0.899333325  | 8.11410426   | 5.841953781  | 7.85492E-05 | 0.021947271 |
| ENSMUSG00000050390 | C77080   | 1.100606755  | 4.008047025  | 5.824856679  | 8.06733E-05 | 0.021947271 |
| ENSMUSG00000058897 | Col25a1  | 1.145484143  | 6.457814805  | 5.817728948  | 8.15768E-05 | 0.021947271 |
| ENSMUSG00000025089 | Gfra1    | 1.467929152  | 4.267875815  | 5.853457969  | 7.71533E-05 | 0.021947271 |
| ENSMUSG00000012405 | Rpl15    | -0.906856775 | 6.677200075  | -5.773069762 | 8.74862E-05 | 0.022362233 |
| ENSMUSG00000021728 | Emb      | 0.914199758  | 5.859278388  | 5.781838677  | 8.62911E-05 | 0.022362233 |
| ENSMUSG00000032948 | Lipi     | -0.936729854 | 5.444723773  | -5.663403914 | 0.000104002 | 0.025438301 |
| ENSMUSG00000022324 | Matn2    | -0.694566276 | 5.740143219  | -5.640097671 | 0.000107918 | 0.025438301 |
| ENSMUSG00000052459 | Atp6v1a  | 0.718305056  | 8.851933228  | 5.638604413  | 0.000108174 | 0.025438301 |
| ENSMUSG00000044447 | Dock5    | 1.048477353  | 6.571337781  | 5.639942804  | 0.000107945 | 0.025438301 |
| ENSMUSG00000017737 | Mmp9     | 1.19764316   | 9.755281083  | 5.569229207  | 0.000120814 | 0.027853587 |
| ENSMUSG00000035296 | Sgcg     | -4.411710792 | -0.922779598 | -5.517657881 | 0.000131215 | 0.028010594 |
| ENSMUSG00000032291 | Crabp1   | -2.155264427 | 3.115239671  | -5.497116825 | 0.000135618 | 0.028010594 |
| ENSMUSG00000052854 | Nrk      | -1.487662892 | 6.623819756  | -5.547251564 | 0.000125136 | 0.028010594 |
| ENSMUSG00000001348 | Acp5     | 0.793398575  | 8.627342467  | 5.516153703  | 0.000131533 | 0.028010594 |
| ENSMUSG00000021306 | Gpr137b  | 0.861604003  | 6.046324047  | 5.519626396  | 0.000130802 | 0.028010594 |
| ENSMUSG00000032122 | Slc37a2  | 1.191073369  | 7.077239901  | 5.496333193  | 0.000135789 | 0.028010594 |
| ENSMUSG00000069919 | Hba-a1   | -1.337990689 | 7.815219545  | -5.422264917 | 0.000153024 | 0.030909916 |
| ENSMUSG00000020689 | Itgb3    | 1.110567359  | 7.880369008  | 5.41393388   | 0.000155102 | 0.030909916 |
| ENSMUSG00000027562 | Car2     | 0.745533042  | 6.189698692  | 5.394819185  | 0.000159983 | 0.031351269 |
| ENSMUSG00000022519 | Srl      | -0.874711972 | 4.426953711  | -5.369870117 | 0.000166598 | 0.03211249  |
| ENSMUSG00000040037 | Negr1    | -2.06759258  | 3.207329165  | -5.347098779 | 0.000172888 | 0.032266944 |
| ENSMUSG00000041362 | Shtn1    | 0.856606818  | 5.623009126  | 5.348913307  | 0.000172378 | 0.032266944 |
| ENSMUSG00000029765 | Plxna4   | 1.049654389  | 5.846000814  | 5.319457787  | 0.000180861 | 0.033227474 |
| ENSMUSG00000035258 | Abi3bp   | -1.564181951 | 4.695670152  | -5.29502116  | 0.000188231 | 0.033533688 |
| ENSMUSG00000027962 | Vcam1    | -1.033135854 | 4.531254283  | -5.295700595 | 0.000188022 | 0.033533688 |
| ENSMUSG00000021390 | Ogn      | -1.35118064  | 7.552490868  | -5.285796718 | 0.000191095 | 0.033535785 |
| ENSMUSG00000047139 | Cd24a    | -0.988039433 | 5.207433327  | -5.274863718 | 0.000194549 | 0.033639831 |
| ENSMUSG00000026072 | Il1r1    | 0.782735636  | 4.957639421  | 5.248885822  | 0.000203022 | 0.034101898 |
| ENSMUSG00000028581 | Laptm5   | 0.879244011  | 6.642567459  | 5.25154349   | 0.000202138 | 0.034101898 |
| ENSMUSG00000032060 | Cryab    | -1.110150001 | 3.610742127  | -5.220757626 | 0.000212635 | 0.035213634 |
| ENSMUSG00000024236 | Svil     | 0.624813843  | 7.133248611  | 5.188180982  | 0.000224371 | 0.036640971 |
| ENSMUSG00000026576 | Atp1b1   | 1.17396213   | 4.596809676  | 5.172977602  | 0.000230079 | 0.037058409 |
| ENSMUSG00000042082 | Arsb     | 0.97021764   | 7.506223253  | 5.160310942  | 0.000234951 | 0.037331753 |
| ENSMUSG00000004151 | Etv1     | 0.730282583  | 4.988104973  | 5.132028881  | 0.000246224 | 0.038601426 |
| ENSMUSG00000002014 | Ssr4     | -0.810564086 | 5.903376453  | -5.097609777 | 0.000260716 | 0.039301265 |
| ENSMUSG00000034707 | Gns      | 0.727994379  | 7.459110088  | 5.104733751  | 0.000257645 | 0.039301265 |
| ENSMUSG00000027670 | Ocstamp  | 1.019536701  | 5.872442547  | 5.107174041  | 0.000256601 | 0.039301265 |
| ENSMUSG00000061731 | Ext1     | 0.663550112  | 7.436421895  | 5.069385813  | 0.000273267 | 0.04067181  |
| ENSMUSG00000035357 | Pdzrn3   | -0.775776383 | 5.557112496  | -5.047366705 | 0.000283499 | 0.041667193 |
| ENSMUSG00000000290 | Itgb2    | 0.939153536  | 5.118505724  | 5.024342179  | 0.000294628 | 0.042768391 |
| ENSMUSG00000033220 | Rac2     | 0.7747666    | 6.466527167  | 5.001754487  | 0.000305993 | 0.043876437 |
| ENSMUSG00000023886 | Smoc2    | -1.076440655 | 5.017467359  | -4.98683623  | 0.000313751 | 0.043917621 |
| ENSMUSG00000039116 | Gpr126   | -0.981742058 | 4.952859094  | -4.988178407 | 0.000313044 | 0.043917621 |
| ENSMUSG00000015134 | Aldh1a3  | -1.172030326 | 5.661165159  | -4.96080253  | 0.000327786 | 0.044910263 |
| ENSMUSG00000026921 | Egfl7    | -0.844921515 | 4.284607323  | -4.957154752 | 0.000329805 | 0.044910263 |
| ENSMUSG00000018567 | Gabarap  | -0.694331619 | 7.756610472  | -4.952676418 | 0.000332301 | 0.044910263 |
| ENSMUSG00000037533 | Rapgef6  | 0.614649699  | 7.303891696  | 4.92217191   | 0.000349838 | 0.046743173 |

|                    |           |              |             |              |             |             |
|--------------------|-----------|--------------|-------------|--------------|-------------|-------------|
| ENSMUSG00000026596 | Abl2      | 0.608326336  | 6.50724323  | 4.910707644  | 0.000356678 | 0.047121542 |
| ENSMUSG00000044468 | Fam46c    | -0.684580972 | 6.669624759 | -4.897416701 | 0.000364783 | 0.047656834 |
| ENSMUSG00000004730 | Emr1      | -2.239807676 | 1.348603199 | -4.832587645 | 0.000407175 | 0.049783334 |
| ENSMUSG00000027313 | Chac1     | -2.213689517 | 4.887600415 | -4.764393172 | 0.000457375 | 0.049783334 |
| ENSMUSG00000027996 | Sfrp2     | -1.171324394 | 4.710267004 | -4.788885324 | 0.000438639 | 0.049783334 |
| ENSMUSG00000062515 | Fabp4     | -1.05622216  | 3.509023446 | -4.704234021 | 0.000507036 | 0.049783334 |
| ENSMUSG00000028583 | Pdnp      | -1.045235352 | 3.565172539 | -4.802701535 | 0.000428426 | 0.049783334 |
| ENSMUSG00000044337 | Ackr3     | -1.019213136 | 4.030412869 | -4.708330855 | 0.000503482 | 0.049783334 |
| ENSMUSG00000029838 | Ptn       | -0.936047162 | 8.138301746 | -4.752584264 | 0.000466706 | 0.049783334 |
| ENSMUSG00000027204 | Fbn1      | -0.801254068 | 6.408244189 | -4.808538301 | 0.000424186 | 0.049783334 |
| ENSMUSG00000026421 | Csrp1     | -0.783880408 | 6.759861112 | -4.787747037 | 0.000439492 | 0.049783334 |
| ENSMUSG00000026725 | Tnn       | -0.777064263 | 7.437115497 | -4.847170068 | 0.000397209 | 0.049783334 |
| ENSMUSG00000071856 | Mcc       | -0.73828315  | 5.345518229 | -4.714396914 | 0.000498266 | 0.049783334 |
| ENSMUSG00000024534 | Sncap     | -0.723674183 | 4.868083805 | -4.694867838 | 0.000515261 | 0.049783334 |
| ENSMUSG00000038871 | Bpgm      | -0.682666203 | 5.249711873 | -4.7094474   | 0.000502517 | 0.049783334 |
| ENSMUSG00000022912 | Pros1     | 0.663131966  | 6.459136494 | 4.749861565  | 0.000468885 | 0.049783334 |
| ENSMUSG00000033705 | Stard9    | 0.706268577  | 6.374308981 | 4.698304549  | 0.000512227 | 0.049783334 |
| ENSMUSG00000061175 | Fnip2     | 0.710174275  | 5.074804605 | 4.84910423   | 0.000395907 | 0.049783334 |
| ENSMUSG00000028111 | Ctsk      | 0.713395398  | 9.9623244   | 4.816083029  | 0.000418771 | 0.049783334 |
| ENSMUSG00000075324 | Figf      | 0.737656804  | 5.609855492 | 4.780463665  | 0.000444989 | 0.049783334 |
| ENSMUSG00000028962 | Slc4a2    | 0.773555819  | 6.05593102  | 4.795937482  | 0.000433394 | 0.049783334 |
| ENSMUSG00000041235 | Chd7      | 0.793445297  | 5.723571848 | 4.736175534  | 0.000480003 | 0.049783334 |
| ENSMUSG00000039062 | Anpep     | 0.813927796  | 8.056912398 | 4.76404628   | 0.000457646 | 0.049783334 |
| ENSMUSG00000068854 | Hist2h2be | 0.830691553  | 4.786180283 | 4.735427416  | 0.000480619 | 0.049783334 |
| ENSMUSG00000038665 | Dgki      | 0.831832322  | 4.196277449 | 4.707501683  | 0.000504199 | 0.049783334 |
| ENSMUSG00000079057 | Cyp4v3    | 0.83836864   | 4.764351948 | 4.838702637  | 0.000402965 | 0.049783334 |
| ENSMUSG00000022231 | Sema5a    | 0.839094343  | 9.365098271 | 4.837629137  | 0.0004037   | 0.049783334 |
| ENSMUSG00000026437 | Cdk18     | 0.88555389   | 3.867251827 | 4.693416906  | 0.000516548 | 0.049783334 |
| ENSMUSG00000022012 | Enox1     | 0.892698352  | 3.686678832 | 4.709026013  | 0.000502881 | 0.049783334 |
| ENSMUSG00000018774 | Cd68      | 0.959283668  | 7.245963357 | 4.703581561  | 0.000507605 | 0.049783334 |
| ENSMUSG00000079625 | Tm4sf19   | 1.030522587  | 3.924772294 | 4.762574467  | 0.000458799 | 0.049783334 |
| ENSMUSG00000038418 | Egr1      | 1.120357726  | 6.447009919 | 4.772930692  | 0.000450751 | 0.049783334 |
| ENSMUSG00000049493 | Pls1      | 1.373575186  | 2.360582503 | 4.733077184  | 0.000482558 | 0.049783334 |
| ENSMUSG00000062151 | Unc13c    | 1.540649612  | 3.574785275 | 4.723859106  | 0.000490244 | 0.049783334 |

Table S4. Primers used to generate riboprobe templates for RNA *in situ* hybridization.

| Gene         | Primers                                                                                                   | References             |
|--------------|-----------------------------------------------------------------------------------------------------------|------------------------|
| <i>Ank</i>   | 5'-GAGTAATACGACTCACTATAGGGTGGATGTGCCTCAATCTCA-3'<br>5'-GAGATTAACCCTCACTAAAGGGACACAGAGTTCTGCAAAGGCAA-3'    | Uzuki et al., 2014     |
| <i>Csf1r</i> | 5'-GAGTAATACGACTCACTATAGGGAGGAGGTGTCTGTGGGTGAC-3'<br>5'-GAGATTAACCCTCACTAAAGGGATGGTACTTCGGCTTCTGCTT-3'    | Designed using Primer3 |
| <i>Enpp1</i> | 5'-GAGTAATACGACTCACTATAGGGGCTGTCTGAGACTCCCTTGG-3'<br>5'-GAGATTAACCCTCACTAAAGGGAGTCCCAGACCACGTACTACT-3'    | Designed using Primer3 |
| <i>Itgb3</i> | 5'-GAGTAATACGACTCACTATAGGGGAAAATGTCGTCAGCCTTTACC-3'<br>5'-GAGATTAACCCTCACTAAAGGGAGCAGGAGAAGTCATCGCACTC-3' | Diez-Roux et al., 2011 |
